# Supplementary material
Source: MDPI journal article supplement (https://www.mdpi.com/2073-4441/7/7/3320)
Supplement: s1 [file s1]

# Supplementary Materials

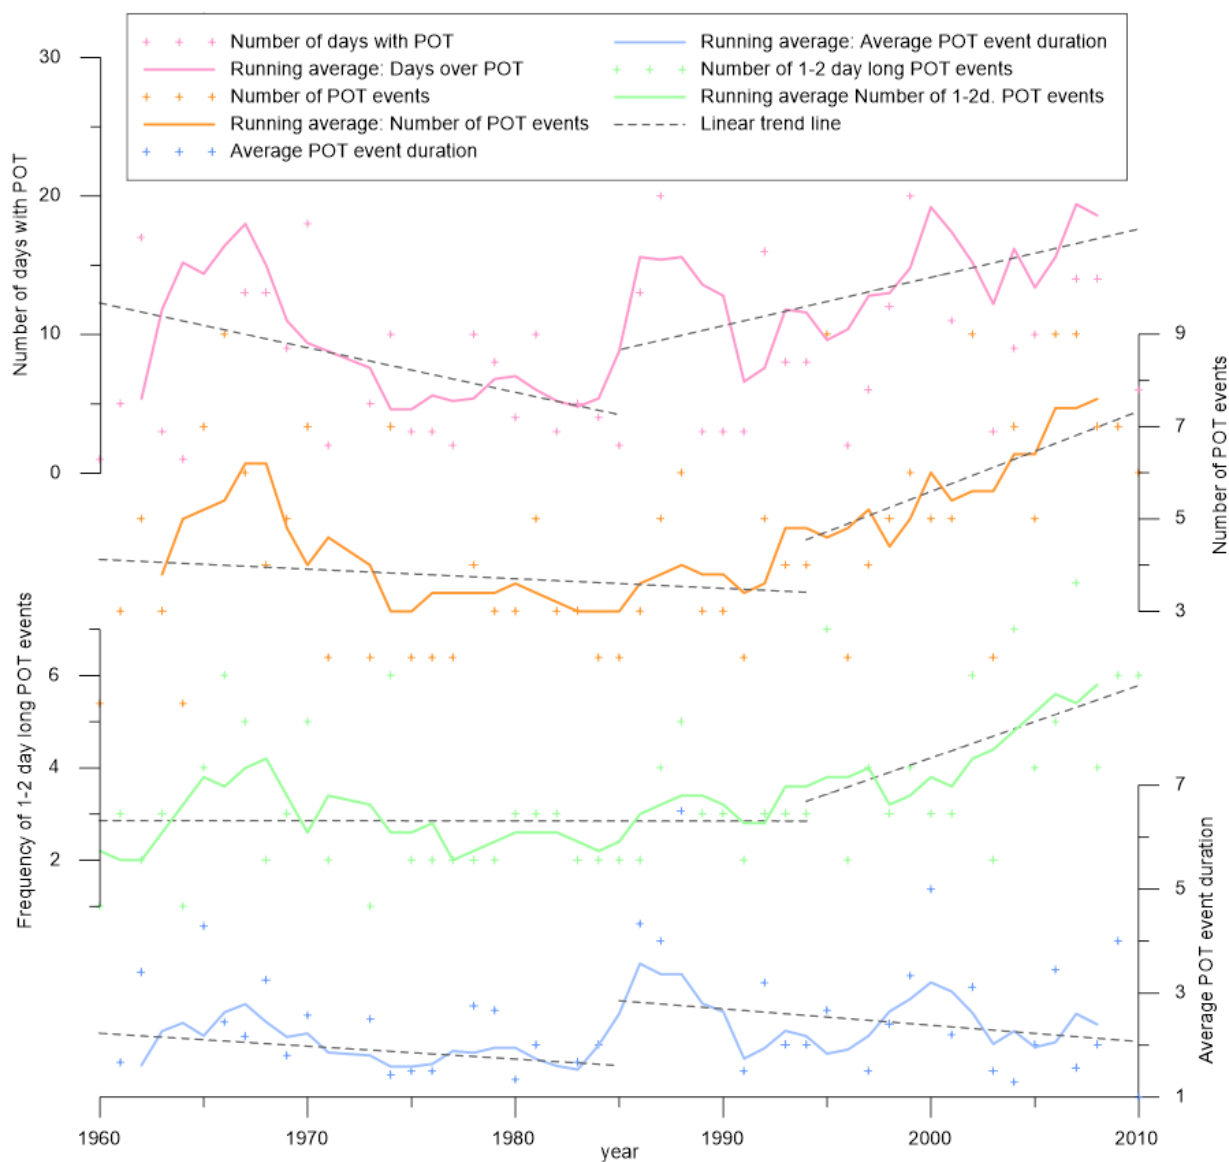

**Figure S1.** Changing frequency and duration of peak flow events.

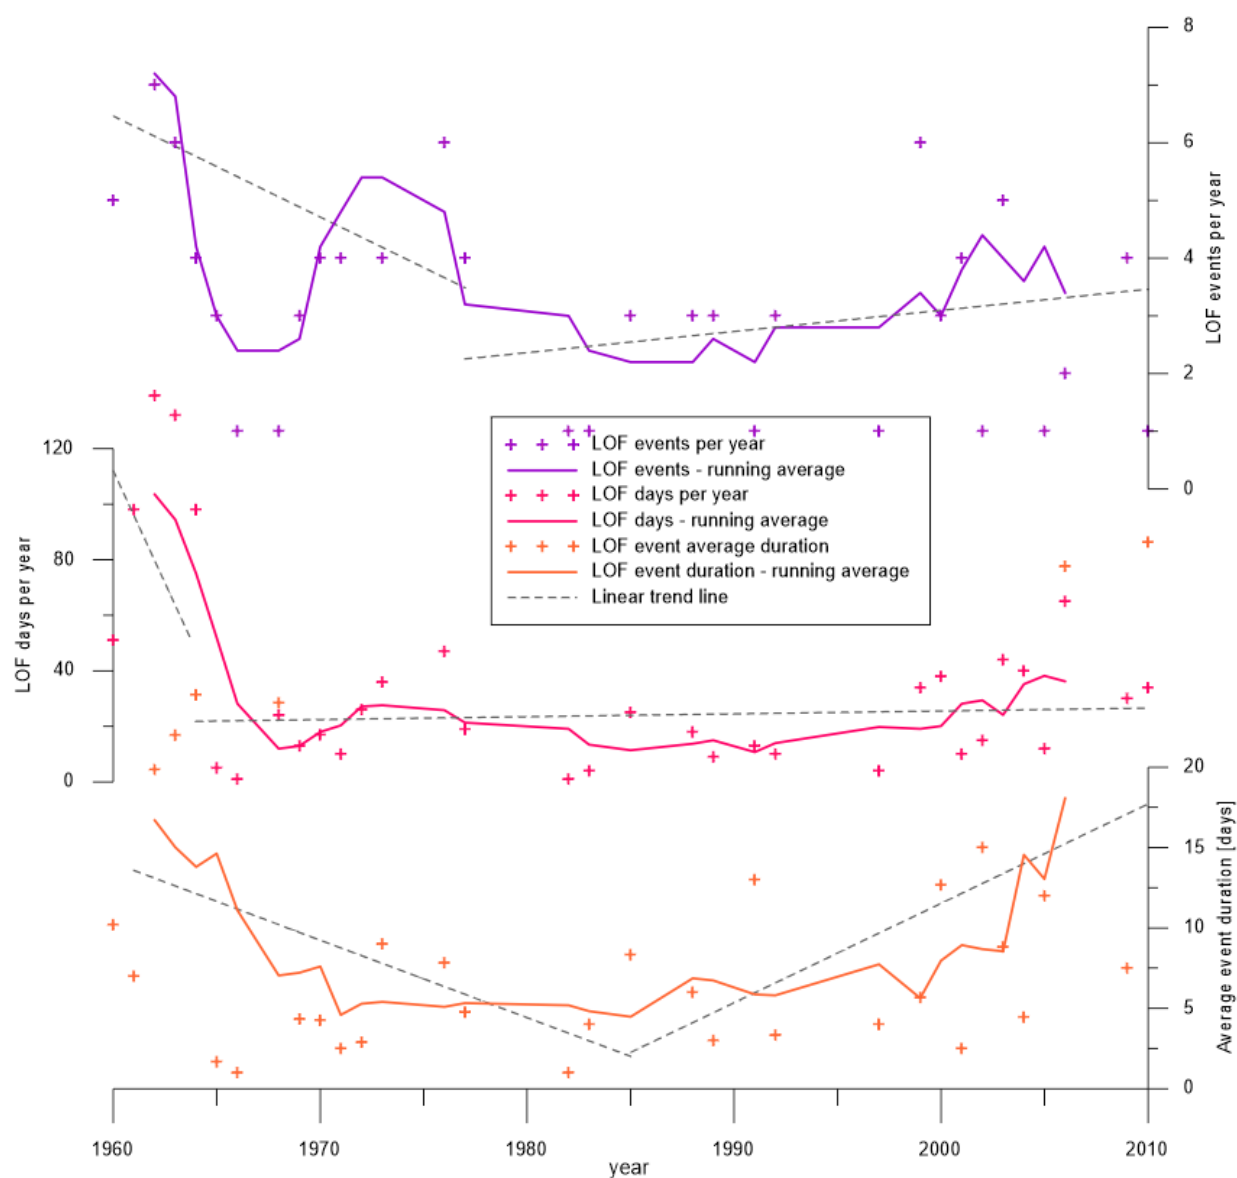

**Figure S2.** Changing frequency and duration of low flow events.

© 2015 by the authors; licensee MDPI, Basel, Switzerland. This article is an open access article distributed under the terms and conditions of the Creative Commons Attribution license (<http://creativecommons.org/licenses/by/4.0/>).
